# Supplementary material for: Floral shape predicts bee–parasite transmission potential
Source: PubMed Central journal article supplement — Ecology. 2022 Jun 12;103(7):e3730. doi: 10.1002/ecy.3730 (PMC9255851; doi:10.1002/ecy.3730), 2022-06-12
Supplement: NIHMS1797744-supplement-AppendixS3.pdf [file NIHMS1797744-supplement-AppendixS3.pdf]

**Appendix S3:** Floral shape predicts bee–parasite transmission potential. Mario S. Pinilla-Gallego, Wee-Hao Ng, Victoria E. Amaral, and Rebecca E. Irwin. *Ecology*.

SUPPLEMENTARY FIGURES

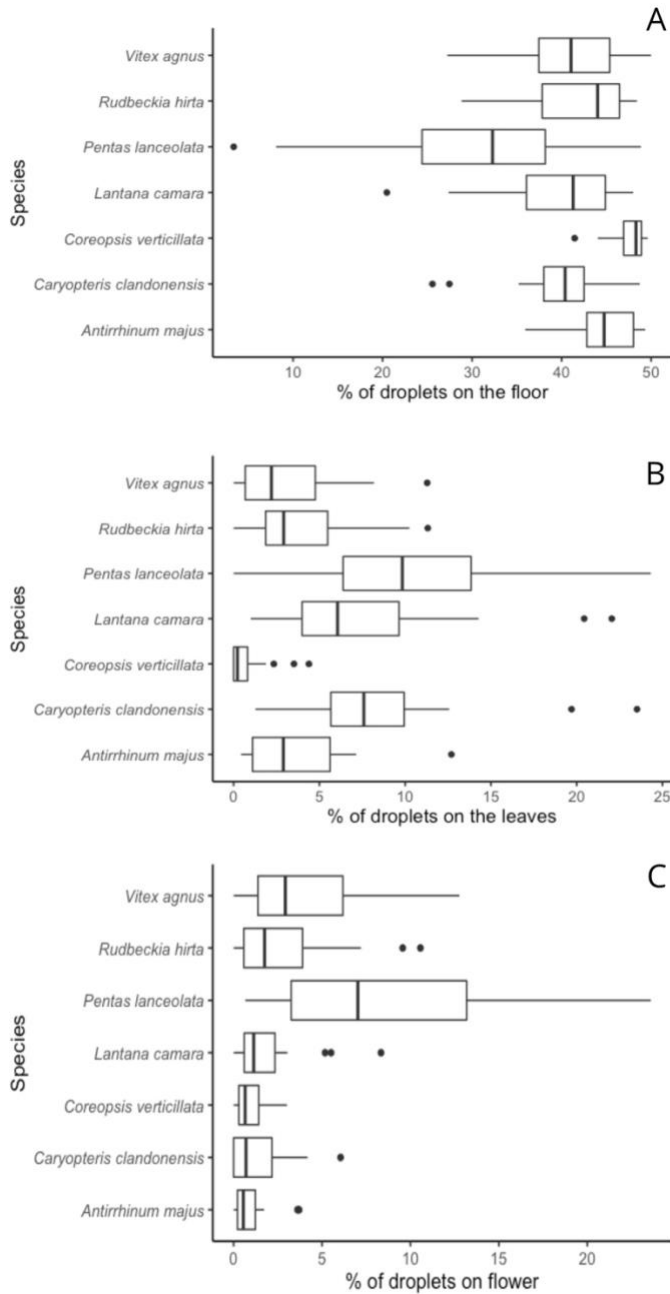

Figure S1. Experiment 1, Deposition: Species identity had a significant effect on the percentage of droplets per cage that ended up on (A) the floor of the cage, (B) leaves, and (C) flowers. Figures depict boxplots.

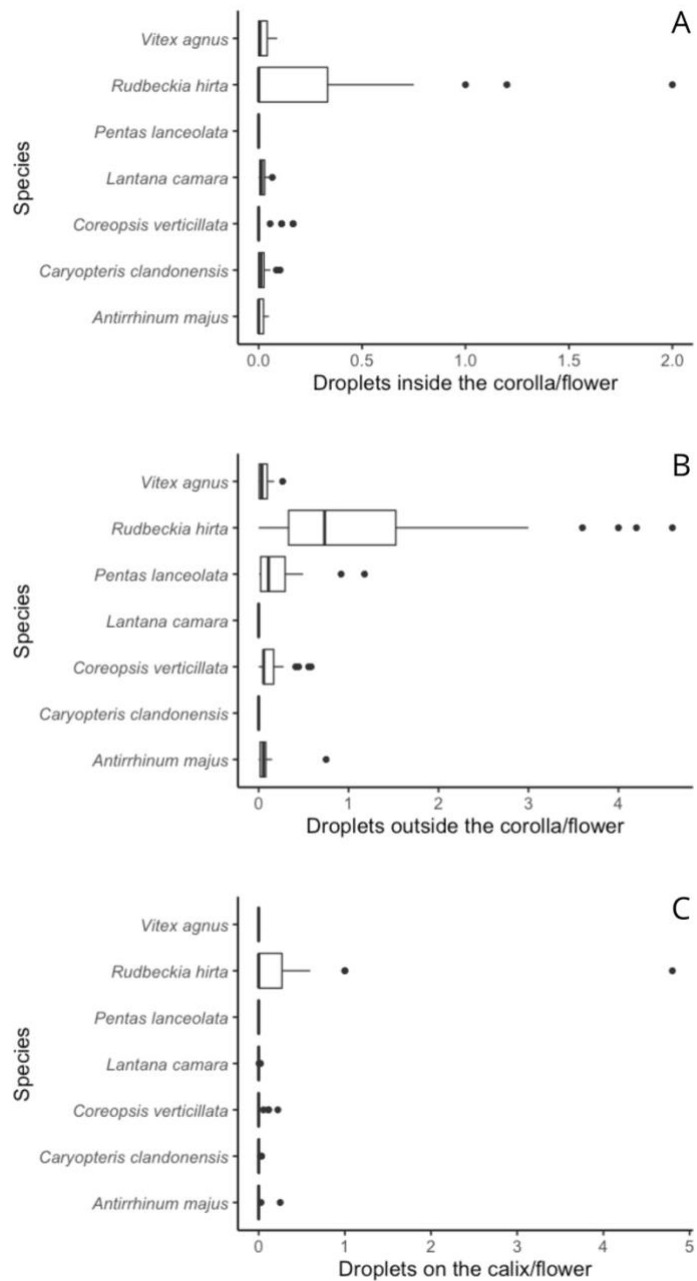

Figure S2. Experiment 1, Deposition: Species identity had a significant effect on the proportion of the total number of droplets per cage that ended up A) inside the corolla, B) outside the corolla and C) on the calix, to the number of flowers in the cage.

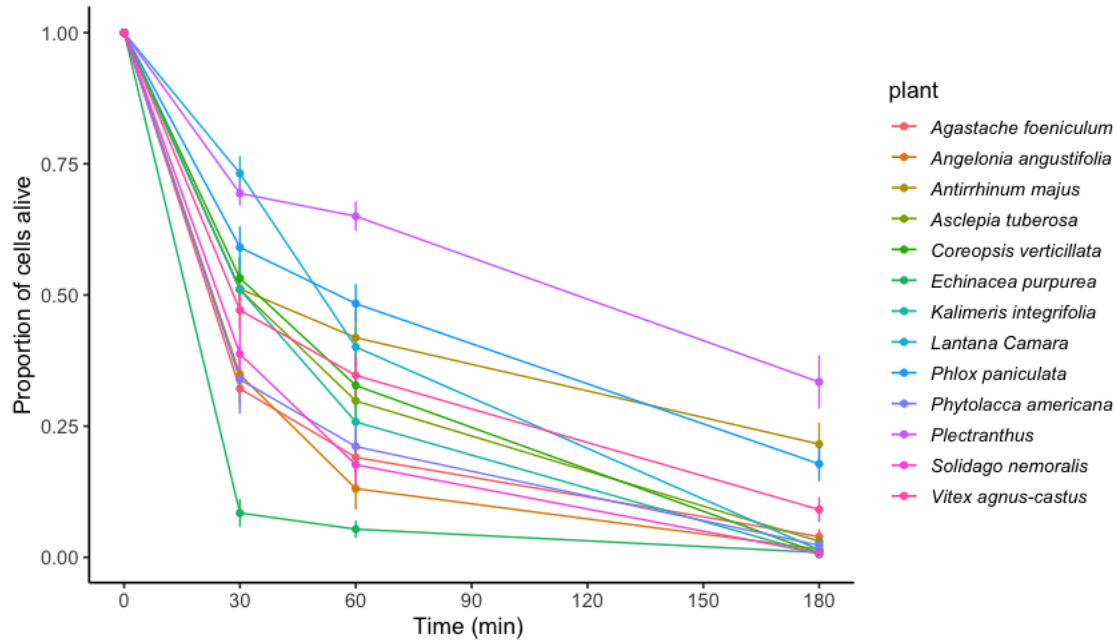

Figure S3. Experiment 2, Survival: Proportion of *C. bombi* cells alive per droplet on flowers after 30 min, 1 h and 3h. This figure combines survival data for both flower locations for the 11 plant species where two locations were tested (see Table 1).

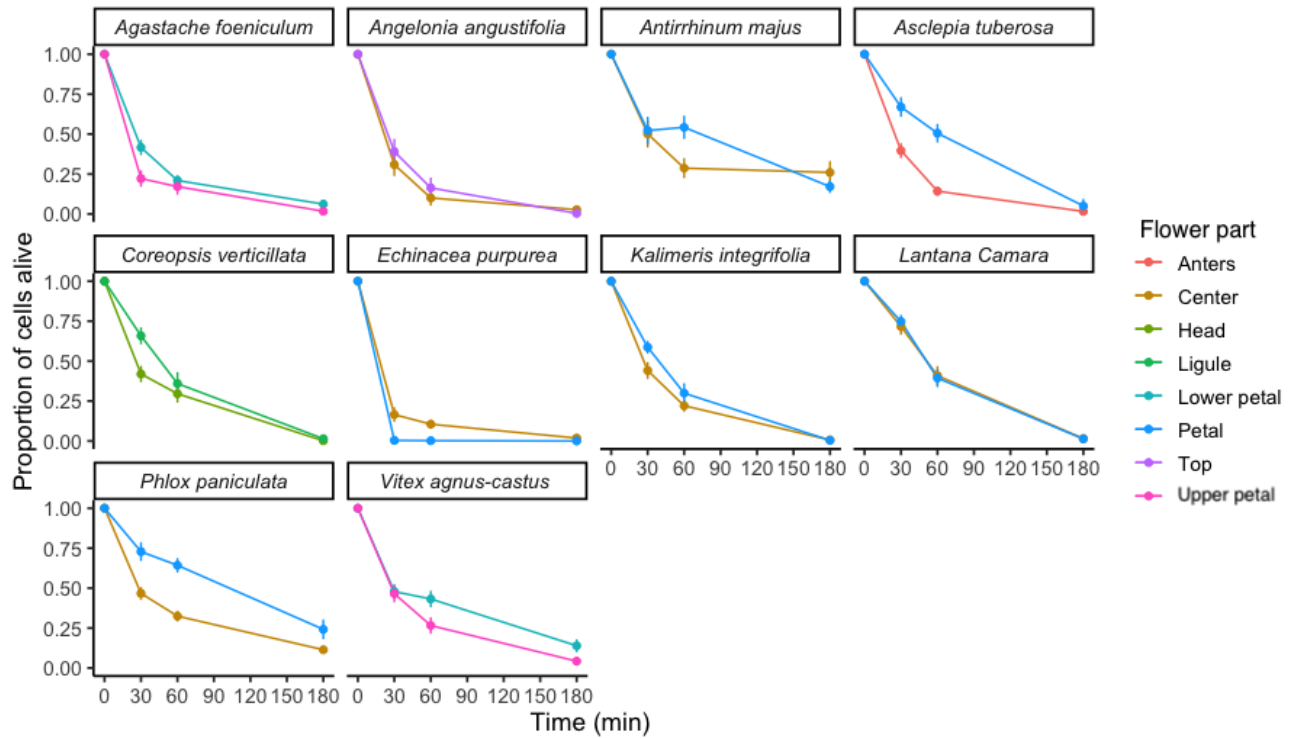

Figure S4. Experiment 2, Survival: Proportion of *C. bombi* cells alive per droplet on different floral parts of 10 plant species where two locations per flower were tested. *Plectranthus* sp. is not included due to high censoring for this species. We found significant differences between flower parts only for *E. purpurea*.

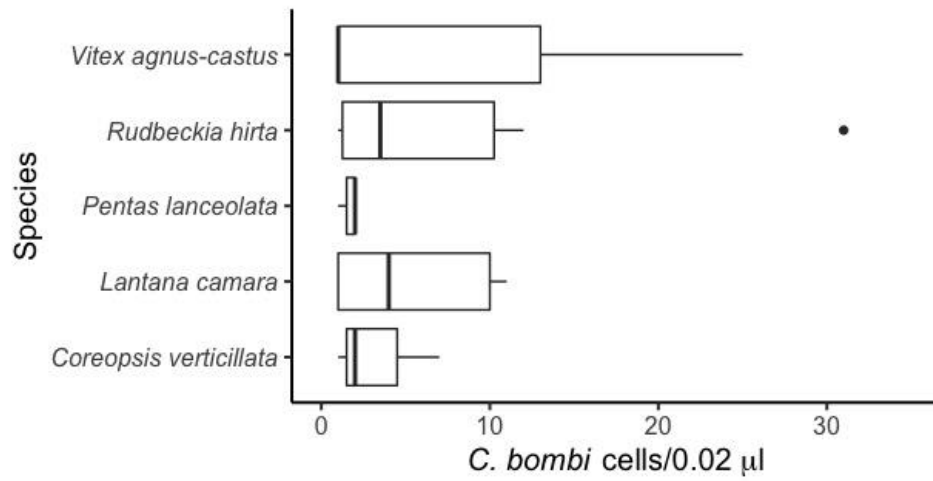

Figure S5. Experiment 3, Acquisition: Boxplot of the intensity of infection (cells/0.02  $\mu$ l) of bees that got infected during the acquisition trials. Species identity was not a significant predictor in the species-based model.

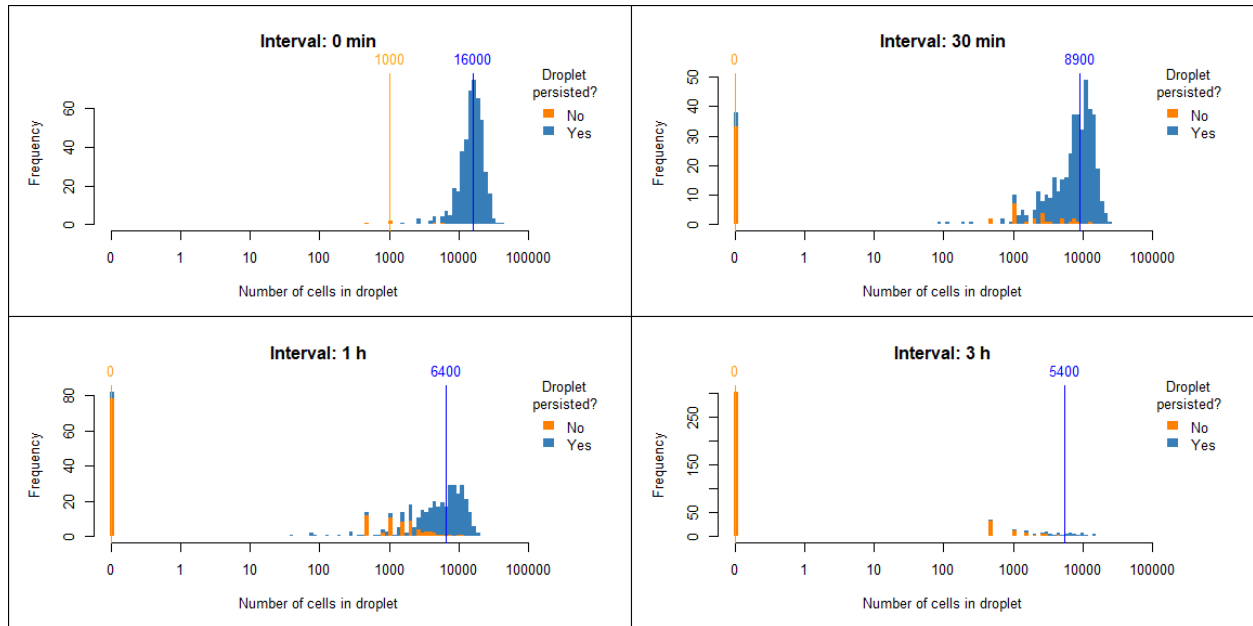

Figure S6. Stacked histograms for the log transformed number of cells in a droplet, when measured at four different time intervals. This figure combines all plant species and locations of droplets. All cell counts included a +0.1 offset before log transformation, so that 0 is mapped to a finite value. Blue corresponds to droplets that persisted at the time of measurement (i.e., the liquid matrix remained present), while orange corresponds to those that did not (e.g., due to evaporation; distilled water had to be added to facilitate cell recovery). Vertical lines represent the median number of cells, separately for droplets that did (blue line) and did not (orange line) persist. We found that droplets with zero counts were overwhelmingly those that did not persist. Droplets that persisted almost always had nonzero counts, although the median count among these droplets decreased over time. Together, this suggests that two processes were occurring: a gradual reduction in cell counts while in the liquid matrix, and a complete loss of all cells that occurred very rapidly after the liquid matrix was lost.

Figure S7. Cell counts in droplets that persisted, grouped by flower species. The purpose of this figure is to further explore the gradual cell loss in the liquid matrix observed in Fig. S6. Species were arranged from left to right according to how long droplets could persist on that species (evaluated using a separate proportional hazards model where droplet persistence indicated survival). We found that gradual loss is more rapid for species on the left than those on the right. Therefore, flower morphologies or traits that affect the rate of droplet loss might also affect the rate of gradual cell loss.

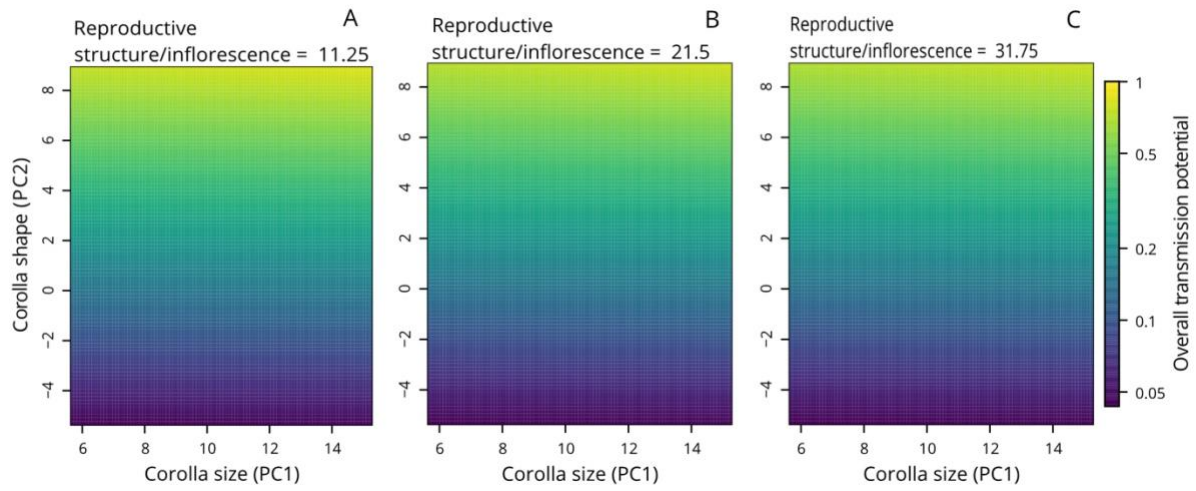

Figure S8. Overall transmission potential. A, B and C show the simultaneous dependence on flower size and shape, with the number of structures per inflorescence set at the 25%, 50% and 75% quantiles of the range, respectively.



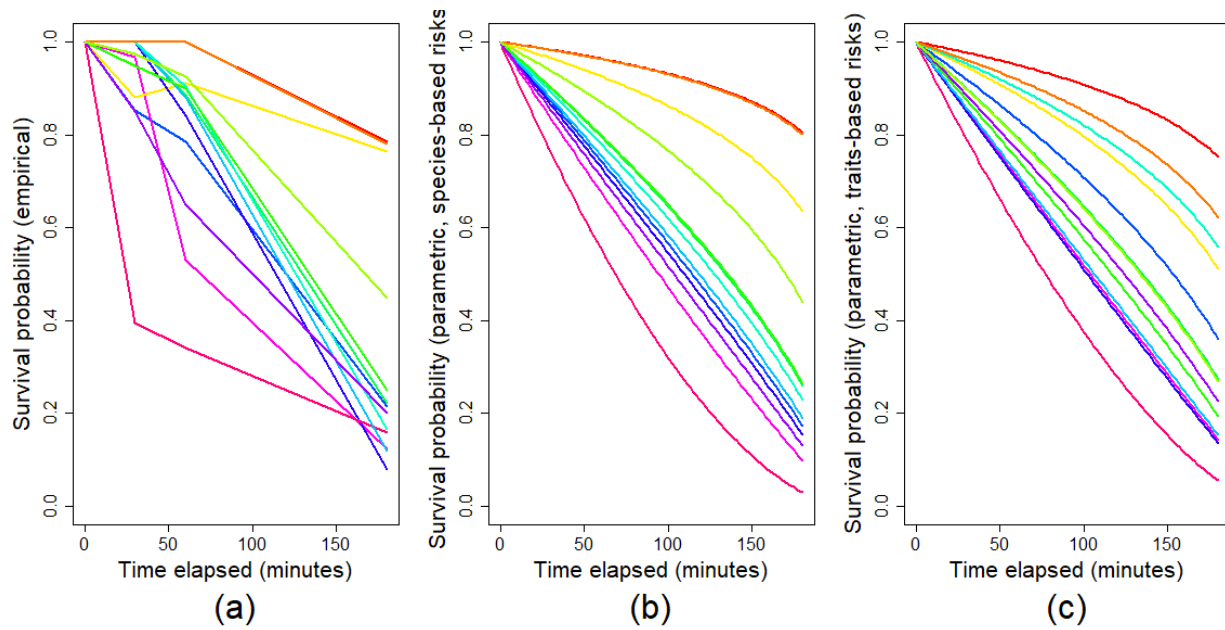

Figure S9: Survival curves of droplets on different plant species. Each color corresponds to one species. (a) Empirical. (b) Parametric with proportional hazards, based on risk scores calculated from a species-based Cox model. (c) Parametric with proportional hazards, based on risk scores calculated from a trait-based Cox model. See the text for the parametric form assumed in (b) and (c).

## SUPPLEMENTARY TABLES

Table S1. Pearson correlations between the first two principal components (floral size and shape) and floral morphological traits (corolla width and length). Statistically significant correlations ( $P < 0.05$ ) noted by \*. The consistent, positive correlations between PC1 and traits suggest that PC1 describes flower size. The mixture of positive and negative correlations between PC2 and traits suggests that PC2 describes flower shape.

|                | Floral size<br>(PC1) | Floral shape<br>(PC2) |
|----------------|----------------------|-----------------------|
| Corolla width  | 0.72*                | 0.71*                 |
| Corolla length | 0.96*                | -0.23*                |

Table S2. Mean, minimum, maximum, standard deviation (SD) and sample size (N) for each floral trait measured for each plant species, as well as the floral size and shape.

| Species                         | Reproductive structures per stalk |
|---------------------------------|-----------------------------------|-----------------------------------|-----------------------------------|-----------------------------------|-----------------------------------|
|                                 | mean                              | min                               | max                               | SD                                | N                                 |
| <i>Agastache foeniculum</i>     | 17                                | 10                                | 25                                | 4                                 | 20                                |
| <i>Angelonia Angustifolia</i>   | 11                                | 3                                 | 15                                | 3                                 | 20                                |
| <i>Antirrhinum majus</i>        | 2                                 | 1                                 | 3                                 | 1                                 | 20                                |
| <i>Asclepia tuberosa</i>        | 11                                | 4                                 | 35                                | 6                                 | 20                                |
| <i>Caryopteris clandonensis</i> | 186                               | 55                                | 1326                              | 275                               | 20                                |
| <i>Coreopsis verticillata</i>   | 24                                | 2                                 | 64                                | 13                                | 20                                |
| <i>Echinacea purpurea</i>       | 1                                 | 1                                 | 1                                 | 0                                 | 20                                |
| <i>Kalimeris integrifolia</i>   | 173                               | 40                                | 441                               | 109                               | 20                                |
| <i>Lantana camara</i>           | 16                                | 2                                 | 26                                | 8                                 | 20                                |
| <i>Pentas lanceolata</i>        | 26                                | 9                                 | 54                                | 10                                | 20                                |
| <i>Phlox paniculata</i>         | 19                                | 2                                 | 39                                | 9                                 | 20                                |
| <i>Phytolacca americana</i>     | 25                                | 10                                | 42                                | 9                                 | 20                                |
| <i>Plectranthus sp.</i>         | 26                                | 12                                | 40                                | 9                                 | 20                                |
| <i>Rudbeckia hirta</i>          | 1                                 | 1                                 | 1                                 | 0                                 | 20                                |
| <i>Solidago nemoralis</i>       | 26                                | 9                                 | 49                                | 11                                | 20                                |
| <i>Vitex agnus-castus</i>       | 42                                | 10                                | 130                               | 29                                | 20                                |
| Species                         | Corolla Length (mm)               |
|                                 | mean                              | min                               | max                               | SD                                | N                                 |
| <i>Agastache foeniculum</i>     | 7                                 | 6                                 | 9                                 | 1                                 | 20                                |
| <i>Angelonia Angustifolia</i>   | 4                                 | 2                                 | 5                                 | 1                                 | 20                                |
| <i>Antirrhinum majus</i>        | 28                                | 24                                | 32                                | 2                                 | 20                                |
| <i>Asclepia tuberosa</i>        | 6                                 | 5                                 | 6                                 | 0                                 | 20                                |
| <i>Caryopteris clandonensis</i> | 7                                 | 5                                 | 8                                 | 1                                 | 20                                |
| <i>Coreopsis verticillata</i>   | 3                                 | 2                                 | 4                                 | 1                                 | 20                                |
| <i>Echinacea purpurea</i>       | 24                                | 18                                | 34                                | 4                                 | 20                                |
| <i>Kalimeris integrifolia</i>   | 3                                 | 2                                 | 4                                 | 1                                 | 20                                |
| <i>Lantana camara</i>           | 12                                | 11                                | 14                                | 1                                 | 20                                |
| <i>Pentas lanceolata</i>        | 16                                | 12                                | 19                                | 2                                 | 20                                |
| <i>Phlox paniculata</i>         | 25                                | 20                                | 27                                | 2                                 | 20                                |
| <i>Phytolacca americana</i>     | 2                                 | 2                                 | 2                                 | 0                                 | 20                                |
| <i>Plectranthus sp.</i>         | 16                                | 1                                 | 20                                | 4                                 | 20                                |

|                                 |                           |                           |                           |                           |                           |
|---------------------------------|---------------------------|---------------------------|---------------------------|---------------------------|---------------------------|
| <i>Rudbeckia hirta</i>          | 4                         | 3                         | 5                         | 1                         | 10                        |
| <i>Solidago nemoralis</i>       | 3                         | 3                         | 4                         | 0                         | 20                        |
| <i>Vitex agnus-castus</i>       | 8                         | 6                         | 9                         | 1                         | 20                        |
| <b>Species</b>                  | <b>Corolla Width (mm)</b> |
|                                 | mean                      | min                       | max                       | SD                        | N                         |
| <i>Agastache foeniculum</i>     | 1.93                      | 1.54                      | 2.58                      | 0.31                      | 20                        |
| <i>Angelonia Angustifolia</i>   | 5.14                      | 4.32                      | 6.05                      | 0.54                      | 20                        |
| <i>Antirrhinum majus</i>        | 14.89                     | 11.41                     | 16.82                     | 1.49                      | 20                        |
| <i>Asclepia tuberosa</i>        | 3.10                      | 2.29                      | 3.81                      | 0.38                      | 20                        |
| <i>Caryopteris clandonensis</i> | 2.45                      | 1.75                      | 3.23                      | 0.49                      | 20                        |
| <i>Coreopsis verticillata</i>   | 6.88                      | 5.81                      | 7.98                      | 0.69                      | 20                        |
| <i>Echinacea purpurea</i>       | 24.38                     | 14.57                     | 32.01                     | 4.39                      | 20                        |
| <i>Kalimeris integrifolia</i>   | 5.55                      | 3.04                      | 8.42                      | 1.52                      | 20                        |
| <i>Lantana camara</i>           | 1.00                      | 0.74                      | 1.54                      | 0.20                      | 20                        |
| <i>Pentas lanceolata</i>        | 2.38                      | 1.45                      | 3.67                      | 0.55                      | 20                        |
| <i>Phlox paniculata</i>         | 3.51                      | 2.96                      | 4.00                      | 0.32                      | 20                        |
| <i>Phytolacca americana</i>     | 1.76                      | 1.53                      | 2.21                      | 0.17                      | 20                        |
| <i>Plectranthus sp.</i>         | 2.07                      | 1.37                      | 2.89                      | 0.44                      | 20                        |
| <i>Rudbeckia hirta</i>          | 12.11                     | 9.79                      | 16.81                     | 2.08                      | 10                        |
| <i>Solidago nemoralis</i>       | 1.74                      | 1.15                      | 2.79                      | 0.48                      | 20                        |
| <i>Vitex agnus-castus</i>       | 3.34                      | 2.21                      | 4.15                      | 0.49                      | 20                        |
| <b>Species</b>                  | <b>Floral size</b>        |
|                                 | mean                      | min                       | max                       | SD                        | N                         |
| <i>Agastache foeniculum</i>     | 7.24                      | 5.70                      | 8.38                      | 0.73                      | 20                        |
| <i>Angelonia Angustifolia</i>   | 5.72                      | 4.87                      | 7.24                      | 0.67                      | 20                        |
| <i>Antirrhinum majus</i>        | 31.50                     | 27.21                     | 36.11                     | 2.56                      | 20                        |
| <i>Asclepia tuberosa</i>        | 6.33                      | 5.21                      | 7.00                      | 0.45                      | 20                        |
| <i>Caryopteris clandonensis</i> | 6.95                      | 5.01                      | 8.40                      | 0.98                      | 20                        |
| <i>Coreopsis verticillata</i>   | 5.75                      | 4.86                      | 6.70                      | 0.54                      | 20                        |
| <i>Echinacea purpurea</i>       | 32.60                     | 24.45                     | 45.12                     | 5.73                      | 20                        |
| <i>Kalimeris integrifolia</i>   | 5.70                      | 3.91                      | 7.85                      | 1.01                      | 20                        |
| <i>Lantana camara</i>           | 11.34                     | 10.16                     | 12.69                     | 0.68                      | 20                        |
| <i>Pentas lanceolata</i>        | 15.15                     | 11.38                     | 17.60                     | 1.58                      | 20                        |
| <i>Phlox paniculata</i>         | 23.31                     | 19.13                     | 25.55                     | 1.81                      | 20                        |
| <i>Phytolacca americana</i>     | 2.56                      | 2.16                      | 2.88                      | 0.19                      | 20                        |
| <i>Plectranthus sp.</i>         | 15.33                     | 2.43                      | 18.47                     | 3.49                      | 20                        |
| <i>Rudbeckia hirta</i>          | 9.31                      | 7.31                      | 12.68                     | 1.45                      | 20                        |
| <i>Solidago nemoralis</i>       | 3.56                      | 2.92                      | 4.29                      | 0.39                      | 20                        |
| <i>Vitex agnus-castus</i>       | 8.19                      | 6.81                      | 9.46                      | 0.69                      | 20                        |

| <b>Species</b>                  | <b>Floral shape</b> |
|---------------------------------|---------------------|---------------------|---------------------|---------------------|---------------------|
|                                 | mean                | min                 | max                 | SD                  | N                   |
| <i>Agastache foeniculum</i>     | -1.63               | -2.26               | -0.86               | 0.40                | 20                  |
| <i>Angelonia Angustifolia</i>   | 2.82                | 2.14                | 4.23                | 0.52                | 20                  |
| <i>Antirrhinum majus</i>        | 0.30                | -2.24               | 1.86                | 1.05                | 20                  |
| <i>Asclepia tuberosa</i>        | 0.18                | -0.43               | 0.78                | 0.35                | 20                  |
| <i>Caryopteris clandonensis</i> | -0.88               | -1.49               | -0.22               | 0.36                | 20                  |
| <i>Coreopsis verticillata</i>   | 4.79                | 3.19                | 5.70                | 0.67                | 20                  |
| <i>Echinacea purpurea</i>       | 10.52               | 3.66                | 13.73               | 2.55                | 20                  |
| <i>Kalimeris integrifolia</i>   | 3.31                | 1.20                | 5.43                | 1.25                | 20                  |
| <i>Lantana camara</i>           | -4.85               | -5.63               | -4.38               | 0.33                | 20                  |
| <i>Pentas lanceolata</i>        | -5.30               | -6.48               | -3.67               | 0.81                | 20                  |
| <i>Phlox paniculata</i>         | -8.31               | -9.27               | -6.00               | 0.85                | 20                  |
| <i>Phytolacca americana</i>     | 0.65                | 0.46                | 1.06                | 0.15                | 20                  |
| <i>Plectranthus sp.</i>         | -6.05               | -7.83               | -4.04               | 1.04                | 20                  |
| <i>Rudbeckia hirta</i>          | 8.86                | 6.93                | 12.42               | 1.73                | 10                  |
| <i>Solidago nemoralis</i>       | 0.10                | -0.47               | 0.91                | 0.39                | 20                  |
| <i>Vitex agnus-castus</i>       | -0.53               | -1.83               | 0.14                | 0.50                | 20                  |

Table S3. Experiment 1, Deposition: Post-hoc analysis (Tukey's HSD) for the number of droplets on flowers for the species-based model for deposition.

| Contrast                                                        | Estimate | SE     | DF  | T ratio  | P value    |
|-----------------------------------------------------------------|----------|--------|-----|----------|------------|
| <i>Antirrhinum majus</i> - <i>Caryopteris clandonensis</i>      | 1.0739   | 0.4048 | 175 | 2.6529   | 0.11687836 |
| <i>Antirrhinum majus</i> - <i>Coreopsis verticillata</i>        | -0.8884  | 0.4137 | 175 | -2.1474  | 0.32989712 |
| <i>Antirrhinum majus</i> - <i>Lantana camara</i>                | 1.1034   | 0.4149 | 175 | 2.6592   | 0.11514344 |
| <i>Antirrhinum majus</i> - <i>Pentas lanceolata</i>             | -1.0643  | 0.3988 | 175 | -2.6688  | 0.11254775 |
| <i>Antirrhinum majus</i> - <i>Rudbeckia hirta</i>               | -3.0930  | 0.3936 | 175 | -7.8587  | <0.0001    |
| <i>Antirrhinum majus</i> - <i>Vitex agnus</i>                   | 0.0391   | 0.4210 | 175 | 0.0928   | 0.99999994 |
| <i>Caryopteris clandonensis</i> - <i>Coreopsis verticillata</i> | -1.9624  | 0.3174 | 175 | -6.1823  | <0.0001    |
| <i>Caryopteris clandonensis</i> - <i>Lantana camara</i>         | 0.0295   | 0.3118 | 175 | 0.0945   | 0.99999994 |
| <i>Caryopteris clandonensis</i> - <i>Pentas lanceolata</i>      | -2.1382  | 0.2906 | 175 | -7.3571  | <0.0001    |
| <i>Caryopteris clandonensis</i> - <i>Rudbeckia hirta</i>        | -4.1669  | 0.2954 | 175 | -14.1058 | <0.0001    |
| <i>Caryopteris clandonensis</i> - <i>Vitex agnus</i>            | -1.0349  | 0.3294 | 175 | -3.1418  | 0.03179459 |
| <i>Coreopsis verticillata</i> - <i>Lantana camara</i>           | 1.9918   | 0.3254 | 175 | 6.1214   | <0.0001    |
| <i>Coreopsis verticillata</i> - <i>Pentas lanceolata</i>        | -0.1759  | 0.3051 | 175 | -0.5764  | 0.99739741 |
| <i>Coreopsis verticillata</i> - <i>Rudbeckia hirta</i>          | -2.2045  | 0.3080 | 175 | -7.1567  | <0.0001    |
| <i>Coreopsis verticillata</i> - <i>Vitex agnus</i>              | 0.9275   | 0.3410 | 175 | 2.7199   | 0.09940795 |
| <i>Lantana camara</i> - <i>Pentas lanceolata</i>                | -2.1677  | 0.2949 | 175 | -7.3495  | <0.0001    |
| <i>Lantana camara</i> - <i>Rudbeckia hirta</i>                  | -4.1964  | 0.3068 | 175 | -13.6782 | <0.0001    |
| <i>Lantana camara</i> - <i>Vitex agnus</i>                      | -1.0643  | 0.3386 | 175 | -3.1435  | 0.03163177 |
| <i>Pentas lanceolata</i> - <i>Rudbeckia hirta</i>               | -2.0287  | 0.2849 | 175 | -7.1217  | <0.0001    |
| <i>Pentas lanceolata</i> - <i>Vitex agnus</i>                   | 1.1034   | 0.3190 | 175 | 3.4592   | 0.01188094 |
| <i>Rudbeckia hirta</i> - <i>Vitex agnus</i>                     | 3.1320   | 0.3188 | 175 | 9.8242   | <0.0001    |

Table S4. Experiment 1, Deposition: Post-hoc analysis (Tukey's HSD) for the number of droplets inside the corolla for the species-based model.

| contrast                                          | estimate | SE        | df  | t.ratio | p.value    |
|---------------------------------------------------|----------|-----------|-----|---------|------------|
| Antirrhinum majus - Caryopteris clandonensis      | -0.6053  | 0.5733    | 176 | -1.0558 | 0.93987907 |
| Antirrhinum majus - Coreopsis verticillata        | -0.6636  | 0.6454    | 176 | -1.0283 | 0.94684402 |
| Antirrhinum majus - Lantana camara                | -0.5908  | 0.5762    | 176 | -1.0254 | 0.94755728 |
| Antirrhinum majus - Pentas lanceolata             | 21.4074  | 4983.6269 | 176 | 0.0043  | 1          |
| Antirrhinum majus - Rudbeckia hirta               | -3.0975  | 0.5845    | 176 | -5.2991 | <0.0001    |
| Antirrhinum majus - Vitex agnus                   | -0.8253  | 0.5952    | 176 | -1.3866 | 0.80838417 |
| Caryopteris clandonensis - Coreopsis verticillata | -0.0584  | 0.4504    | 176 | -0.1296 | 0.99999959 |
| Caryopteris clandonensis - Lantana camara         | 0.0144   | 0.3440    | 176 | 0.0420  | 1          |
| Caryopteris clandonensis - Pentas lanceolata      | 22.0127  | 4983.6269 | 176 | 0.0044  | 1          |
| Caryopteris clandonensis - Rudbeckia hirta        | -2.4922  | 0.3579    | 176 | -6.9630 | <0.0001    |
| Caryopteris clandonensis - Vitex agnus            | -0.2201  | 0.3751    | 176 | -0.5866 | 0.99712988 |
| Coreopsis verticillata - Lantana camara           | 0.0728   | 0.4541    | 176 | 0.1603  | 0.99999853 |
| Coreopsis verticillata - Pentas lanceolata        | 22.0711  | 4983.6269 | 176 | 0.0044  | 1          |
| Coreopsis verticillata - Rudbeckia hirta          | -2.4339  | 0.4647    | 176 | -5.2379 | <0.0001    |
| Coreopsis verticillata - Vitex agnus              | -0.1617  | 0.4780    | 176 | -0.3383 | 0.99987742 |
| Lantana camara - Pentas lanceolata                | 21.9983  | 4983.6269 | 176 | 0.0044  | 1          |
| Lantana camara - Rudbeckia hirta                  | -2.5066  | 0.3626    | 176 | -6.9138 | <0.0001    |
| Lantana camara - Vitex agnus                      | -0.2345  | 0.3795    | 176 | -0.6178 | 0.99617666 |
| Pentas lanceolata - Rudbeckia hirta               | -24.5049 | 4983.6269 | 176 | -0.0049 | 1          |
| Pentas lanceolata - Vitex agnus                   | -22.2328 | 4983.6269 | 176 | -0.0045 | 1          |
| Rudbeckia hirta - Vitex agnus                     | 2.2721   | 0.3921    | 176 | 5.7948  | <0.0001    |

Table S5. Experiment 1, Deposition: Post-hoc analysis (Tukey's HSD) for the number of droplets outside the corolla for the species-based model

| contrast                                          | estimate | SE       | df  | t.ratio  | p.value    |
|---------------------------------------------------|----------|----------|-----|----------|------------|
| Antirrhinum majus - Caryopteris clandonensis      | 23.927   | 7217.878 | 175 | 0.00331  | 1          |
| Antirrhinum majus - Coreopsis verticillata        | -0.998   | 0.423    | 175 | -2.36039 | 0.22197585 |
| Antirrhinum majus - Lantana camara                | 23.339   | 6743.605 | 175 | 0.00346  | 1          |
| Antirrhinum majus - Pentas lanceolata             | -1.466   | 0.411    | 175 | -3.56751 | 0.00829986 |
| Antirrhinum majus - Rudbeckia hirta               | -3.065   | 0.400    | 175 | -7.66083 | <0.0001    |
| Antirrhinum majus - Vitex agnus                   | 0.116    | 0.427    | 175 | 0.27212  | 0.99996587 |
| Caryopteris clandonensis - Coreopsis verticillata | -24.925  | 7217.878 | 175 | -0.00345 | 1          |
| Caryopteris clandonensis - Lantana camara         | -0.588   | 9877.953 | 175 | -0.00006 | 1          |
| Caryopteris clandonensis - Pentas lanceolata      | -25.393  | 7217.878 | 175 | -0.00352 | 1          |
| Caryopteris clandonensis - Rudbeckia hirta        | -26.992  | 7217.878 | 175 | -0.00374 | 1          |
| Caryopteris clandonensis - Vitex agnus            | -23.811  | 7217.878 | 175 | -0.00330 | 1          |
| Coreopsis verticillata - Lantana camara           | 24.336   | 6743.605 | 175 | 0.00361  | 1          |
| Coreopsis verticillata - Pentas lanceolata        | -0.468   | 0.310    | 175 | -1.50968 | 0.7387352  |
| Coreopsis verticillata - Rudbeckia hirta          | -2.068   | 0.312    | 175 | -6.63031 | <0.0001    |
| Coreopsis verticillata - Vitex agnus              | 1.114    | 0.344    | 175 | 3.24138  | 0.02360774 |
| Lantana camara - Pentas lanceolata                | -24.804  | 6743.605 | 175 | -0.00368 | 1          |
| Lantana camara - Rudbeckia hirta                  | -26.404  | 6743.605 | 175 | -0.00392 | 1          |
| Lantana camara - Vitex agnus                      | -23.223  | 6743.605 | 175 | -0.00344 | 1          |
| Pentas lanceolata - Rudbeckia hirta               | -1.600   | 0.288    | 175 | -5.55382 | <0.0001    |
| Pentas lanceolata - Vitex agnus                   | 1.582    | 0.321    | 175 | 4.93293  | <0.0001    |
| Rudbeckia hirta - Vitex agnus                     | 3.182    | 0.319    | 175 | 9.97957  | <0.0001    |



Table S6. Experiment 1, Deposition: Post-hoc analysis (Tukey's HSD) for the number of droplets on the calix for the species-based model

| contrast                                          | estimate | SE         | df  | t.ratio | p.value    |
|---------------------------------------------------|----------|------------|-----|---------|------------|
| Antirrhinum majus - Caryopteris clandonensis      | -0.3203  | 0.9807     | 175 | -0.3266 | 0.99990021 |
| Antirrhinum majus - Coreopsis verticillata        | -1.5038  | 1.0203     | 175 | -1.4739 | 0.75991208 |
| Antirrhinum majus - Lantana camara                | 0.2663   | 1.0209     | 175 | 0.2608  | 0.99997344 |
| Antirrhinum majus - Pentas lanceolata             | 21.1493  | 8361.7173  | 175 | 0.0025  | 1          |
| Antirrhinum majus - Rudbeckia hirta               | -4.2634  | 0.9598     | 175 | -4.4421 | 0.00031277 |
| Antirrhinum majus - Vitex agnus                   | 24.0405  | 33453.5527 | 175 | 0.0007  | 1          |
| Caryopteris clandonensis - Coreopsis verticillata | -1.1835  | 0.6369     | 175 | -1.8583 | 0.51075998 |
| Caryopteris clandonensis - Lantana camara         | 0.5865   | 0.6012     | 175 | 0.9756  | 0.95863312 |
| Caryopteris clandonensis - Pentas lanceolata      | 21.4696  | 8361.7173  | 175 | 0.0026  | 1          |
| Caryopteris clandonensis - Rudbeckia hirta        | -3.9431  | 0.5363     | 175 | -7.3529 | <0.0001    |
| Caryopteris clandonensis - Vitex agnus            | 24.3608  | 33453.5527 | 175 | 0.0007  | 1          |
| Coreopsis verticillata - Lantana camara           | 1.7700   | 0.6927     | 175 | 2.5552  | 0.14657703 |
| Coreopsis verticillata - Pentas lanceolata        | 22.6531  | 8361.7173  | 175 | 0.0027  | 1          |
| Coreopsis verticillata - Rudbeckia hirta          | -2.7596  | 0.6121     | 175 | -4.5083 | 0.00023804 |
| Coreopsis verticillata - Vitex agnus              | 25.5443  | 33453.5527 | 175 | 0.0008  | 1          |
| Lantana camara - Pentas lanceolata                | 20.8830  | 8361.7173  | 175 | 0.0025  | 1          |
| Lantana camara - Rudbeckia hirta                  | -4.5297  | 0.6018     | 175 | -7.5267 | <0.0001    |
| Lantana camara - Vitex agnus                      | 23.7742  | 33453.5527 | 175 | 0.0007  | 1          |
| Pentas lanceolata - Rudbeckia hirta               | -25.4127 | 8361.7173  | 175 | -0.0030 | 1          |
| Pentas lanceolata - Vitex agnus                   | 2.8912   | 34482.7276 | 175 | 0.0001  | 1          |
| Rudbeckia hirta - Vitex agnus                     | 28.3039  | 33453.5527 | 175 | 0.0008  | 1          |

Table S7. Experiment 1, Deposition: Post-hoc analysis (Tukey's HSD) for the number of droplets on flowers in the cage for the species-based model

| Contrast                                                        | Estimate | SE     | df  | t.ratio  | p.value    |
|-----------------------------------------------------------------|----------|--------|-----|----------|------------|
| <i>Antirrhinum majus</i> - <i>Caryopteris clandonensis</i>      | 1.8866   | 0.3543 | 175 | 5.32500  | <0.0001    |
| <i>Antirrhinum majus</i> - <i>Coreopsis verticillata</i>        | -0.7147  | 0.3593 | 175 | -1.98905 | 0.42534426 |
| <i>Antirrhinum majus</i> - <i>Lantana camara</i>                | 1.4135   | 0.3555 | 175 | 3.97634  | 0.00194335 |
| <i>Antirrhinum majus</i> - <i>Pentas lanceolata</i>             | -0.9320  | 0.3322 | 175 | -2.80512 | 0.08027277 |
| <i>Antirrhinum majus</i> - <i>Rudbeckia hirta</i>               | -2.4162  | 0.3381 | 175 | -7.14588 | <0.0001    |
| <i>Antirrhinum majus</i> - <i>Vitex agnus</i>                   | -0.2182  | 0.3468 | 175 | -0.62934 | 0.99576821 |
| <i>Caryopteris clandonensis</i> - <i>Coreopsis verticillata</i> | -2.6013  | 0.2928 | 175 | -8.88338 | <0.0001    |
| <i>Caryopteris clandonensis</i> - <i>Lantana camara</i>         | -0.4731  | 0.2855 | 175 | -1.65730 | 0.64527515 |
| <i>Caryopteris clandonensis</i> - <i>Pentas lanceolata</i>      | -2.8186  | 0.2543 | 175 | 11.08415 | <0.0001    |
| <i>Caryopteris clandonensis</i> - <i>Rudbeckia hirta</i>        | -4.3028  | 0.2683 | 175 | 16.03499 | 0          |
| <i>Caryopteris clandonensis</i> - <i>Vitex agnus</i>            | -2.1048  | 0.2787 | 175 | -7.55331 | <0.0001    |
| <i>Coreopsis verticillata</i> - <i>Lantana camara</i>           | 2.1282   | 0.2907 | 175 | 7.32067  | <0.0001    |
| <i>Coreopsis verticillata</i> - <i>Pentas lanceolata</i>        | -0.2173  | 0.2599 | 175 | -0.83586 | 0.98084363 |
| <i>Coreopsis verticillata</i> - <i>Rudbeckia hirta</i>          | -1.7015  | 0.2746 | 175 | -6.19717 | <0.0001    |
| <i>Coreopsis verticillata</i> - <i>Vitex agnus</i>              | 0.4965   | 0.2846 | 175 | 1.74464  | 0.58709999 |
| <i>Lantana camara</i> - <i>Pentas lanceolata</i>                | -2.3455  | 0.2480 | 175 | -9.45771 | <0.0001    |
| <i>Lantana camara</i> - <i>Rudbeckia hirta</i>                  | -3.8297  | 0.2676 | 175 | 14.30963 | 0          |
| <i>Lantana camara</i> - <i>Vitex agnus</i>                      | -1.6317  | 0.2776 | 175 | -5.87773 | <0.0001    |
| <i>Pentas lanceolata</i> - <i>Rudbeckia hirta</i>               | -1.4842  | 0.2347 | 175 | -6.32391 | <0.0001    |
| <i>Pentas lanceolata</i> - <i>Vitex agnus</i>                   | 0.7138   | 0.2458 | 175 | 2.90364  | 0.06202991 |

|                                             |        |        |     |         |         |
|---------------------------------------------|--------|--------|-----|---------|---------|
| <i>Rudbeckia hirta</i> - <i>Vitex agnus</i> | 2.1980 | 0.2589 | 175 | 8.49057 | <0.0001 |
|---------------------------------------------|--------|--------|-----|---------|---------|

Table S8. Percentage of trials in which all *Crithidia bombi* cells died after 3 h for each plant species.

| Plant species                 | n trial | n trials where all cells die after 3 h | % of trials where all cells died |
|-------------------------------|---------|----------------------------------------|----------------------------------|
| <i>Agastache foeniculum</i>   | 42      | 33                                     | 78.6%                            |
| <i>Angelonia angustifolia</i> | 32      | 28                                     | 87.5%                            |
| <i>Antirrhinum majus</i>      | 34      | 8                                      | 23.5%                            |
| <i>Asclepia tuberosa</i>      | 42      | 32                                     | 76.2%                            |
| <i>Coreopsis verticillata</i> | 54      | 51                                     | 94.4%                            |
| <i>Echinacea purpurea</i>     | 40      | 33                                     | 82.5%                            |
| <i>Kalimeris integrifolia</i> | 44      | 39                                     | 88.6%                            |
| <i>Lantana Camara</i>         | 42      | 35                                     | 83.3%                            |
| <i>Pentas lanceolata</i>      | 12      | 7                                      | 58.3%                            |
| <i>Phlox paniculata</i>       | 42      | 9                                      | 21.4%                            |
| <i>Phytolacca americana</i>   | 20      | 15                                     | 75.0%                            |
| <i>Plectranthus</i> sp.       | 32      | 7                                      | 21.9%                            |
| <i>Solidago nemoralis</i>     | 22      | 18                                     | 81.8%                            |
| <i>Vitex agnus-castus</i>     | 40      | 22                                     | 55.0%                            |

Table S9. Experiment 2, Survival: Post-hoc analysis (Tukey's HSD) for the hazard ratio of different flowers species on *C. bombi* for the species-based model.

| Contrast                                                      | estimate | SE    | z-ratio | p-value |
|---------------------------------------------------------------|----------|-------|---------|---------|
| <i>Agastache foeniculum</i> - <i>Angelonia angustifolia</i>   | 0.149    | 0.312 | 0.476   | 1.000   |
| <i>Agastache foeniculum</i> - <i>Antirrhinum majus</i>        | 1.590    | 0.326 | 4.871   | <0.0001 |
| <i>Agastache foeniculum</i> - <i>Asclepia tuberosa</i>        | 0.339    | 0.232 | 1.463   | 0.964   |
| <i>Agastache foeniculum</i> - <i>Coreopsis verticillata</i>   | 0.031    | 0.220 | 0.140   | 1.000   |
| <i>Agastache foeniculum</i> - <i>Echinacea purpurea</i>       | -0.292   | 0.283 | -1.029  | 0.998   |
| <i>Agastache foeniculum</i> - <i>Kalimeris integrifolia</i>   | 0.479    | 0.312 | 1.537   | 0.948   |
| <i>Agastache foeniculum</i> - <i>Lantana Camara</i>           | 0.206    | 0.216 | 0.951   | 0.999   |
| <i>Agastache foeniculum</i> - <i>Phlox paniculata</i>         | 2.121    | 0.364 | 5.824   | <0.0001 |
| <i>Agastache foeniculum</i> - <i>Phytolacca americana</i>     | 0.360    | 0.280 | 1.287   | 0.987   |
| <i>Agastache foeniculum</i> - <i>Plectranthus</i>             | 2.259    | 0.420 | 5.374   | 0.000   |
| <i>Agastache foeniculum</i> - <i>Solidago nemoralis</i>       | 0.241    | 0.326 | 0.741   | 1.000   |
| <i>Agastache foeniculum</i> - ( <i>Vitex agnus-castus</i> )   | 0.791    | 0.244 | 3.237   | 0.063   |
| <i>Angelonia angustifolia</i> - <i>Antirrhinum majus</i>      | 1.441    | 0.315 | 4.580   | 0.0003  |
| <i>Angelonia angustifolia</i> - <i>Asclepia tuberosa</i>      | 0.191    | 0.301 | 0.634   | 1.000   |
| <i>Angelonia angustifolia</i> - <i>Coreopsis verticillata</i> | -0.118   | 0.279 | -0.422  | 1.000   |
| <i>Angelonia angustifolia</i> - <i>Echinacea purpurea</i>     | -0.440   | 0.188 | -2.337  | 0.490   |
| <i>Angelonia angustifolia</i> - <i>Kalimeris integrifolia</i> | 0.331    | 0.216 | 1.533   | 0.949   |
| <i>Angelonia angustifolia</i> - <i>Lantana Camara</i>         | 0.057    | 0.308 | 0.185   | 1.000   |
| <i>Angelonia angustifolia</i> - <i>Phlox paniculata</i>       | 1.972    | 0.426 | 4.630   | 0.0003  |
| <i>Angelonia angustifolia</i> - <i>Phytolacca americana</i>   | 0.212    | 0.337 | 0.628   | 1.000   |

|                                                                  |        |       |        |        |
|------------------------------------------------------------------|--------|-------|--------|--------|
| <i>Angelonia angustifolia</i> -<br><i>Plectranthus</i>           | 2.110  | 0.425 | 4.966  | 0.0001 |
| <i>Angelonia angustifolia</i> -<br><i>Solidago nemoralis</i>     | 0.093  | 0.248 | 0.375  | 1.000  |
| <i>Angelonia angustifolia</i> -<br>( <i>Vitex agnus-castus</i> ) | 0.642  | 0.328 | 1.957  | 0.761  |
| <i>Antirrhinum majus</i> -<br><i>Asclepia tuberosa</i>           | -1.251 | 0.328 | -3.815 | 0.009  |
| <i>Antirrhinum majus</i> -<br><i>Coreopsis verticillata</i>      | -1.559 | 0.314 | -4.971 | 0.0001 |
| <i>Antirrhinum majus</i> -<br><i>Echinacea purpurea</i>          | -1.882 | 0.293 | -6.416 | 0.0001 |
| <i>Antirrhinum majus</i> -<br><i>Kalimeris integrifolia</i>      | -1.111 | 0.316 | -3.519 | 0.026  |
| <i>Antirrhinum majus</i> -<br><i>Lantana Camara</i>              | -1.384 | 0.328 | -4.225 | 0.002  |
| <i>Antirrhinum majus</i> -<br><i>Phlox paniculata</i>            | 0.531  | 0.439 | 1.209  | 0.993  |
| <i>Antirrhinum majus</i> -<br><i>Phytolacca americana</i>        | -1.230 | 0.362 | -3.396 | 0.038  |
| <i>Antirrhinum majus</i> -<br><i>Plectranthus</i>                | 0.669  | 0.458 | 1.458  | 0.965  |
| <i>Antirrhinum majus</i> -<br><i>Solidago nemoralis</i>          | -1.348 | 0.334 | -4.033 | 0.004  |
| <i>Antirrhinum majus</i> -<br>( <i>Vitex agnus-castus</i> )      | -0.799 | 0.346 | -2.311 | 0.509  |
| <i>Asclepia tuberosa</i> -<br><i>Coreopsis verticillata</i>      | -0.309 | 0.237 | -1.304 | 0.986  |
| <i>Asclepia tuberosa</i> -<br><i>Echinacea purpurea</i>          | -0.631 | 0.273 | -2.308 | 0.511  |
| <i>Asclepia tuberosa</i> -<br><i>Kalimeris integrifolia</i>      | 0.140  | 0.301 | 0.465  | 1.000  |
| <i>Asclepia tuberosa</i> -<br><i>Lantana Camara</i>              | -0.134 | 0.240 | -0.557 | 1.000  |
| <i>Asclepia tuberosa</i> -<br><i>Phlox paniculata</i>            | 1.781  | 0.379 | 4.704  | 0.0002 |
| <i>Asclepia tuberosa</i> -<br><i>Phytolacca americana</i>        | 0.021  | 0.295 | 0.071  | 1.000  |
| <i>Asclepia tuberosa</i> -<br><i>Plectranthus</i>                | 1.919  | 0.424 | 4.529  | 0.0004 |
| <i>Asclepia tuberosa</i> -<br><i>Solidago nemoralis</i>          | -0.098 | 0.317 | -0.308 | 1.000  |
| <i>Asclepia tuberosa</i> -<br>( <i>Vitex agnus-castus</i> )      | 0.452  | 0.265 | 1.702  | 0.894  |
| <i>Coreopsis verticillata</i> -<br><i>Echinacea purpurea</i>     | -0.322 | 0.251 | -1.287 | 0.987  |

|                                                                  |        |       |        |         |
|------------------------------------------------------------------|--------|-------|--------|---------|
| <i>Coreopsis verticillata</i> -<br><i>Kalimeris integrifolia</i> | 0.448  | 0.280 | 1.604  | 0.929   |
| <i>Coreopsis verticillata</i> -<br><i>Lantana Camara</i>         | 0.175  | 0.227 | 0.770  | 1.000   |
| <i>Coreopsis verticillata</i> -<br><i>Phlox paniculata</i>       | 2.090  | 0.372 | 5.625  | <0.0001 |
| <i>Coreopsis verticillata</i> -<br><i>Phytolacca americana</i>   | 0.329  | 0.283 | 1.163  | 0.995   |
| <i>Coreopsis verticillata</i> -<br><i>Plectranthus</i>           | 2.228  | 0.414 | 5.384  | <0.0001 |
| <i>Coreopsis verticillata</i> -<br><i>Solidago nemoralis</i>     | 0.211  | 0.298 | 0.708  | 1.000   |
| <i>Coreopsis verticillata</i> -<br>( <i>Vitex agnus-castus</i> ) | 0.760  | 0.255 | 2.987  | 0.127   |
| <i>Echinacea purpurea</i> -<br><i>Kalimeris integrifolia</i>     | 0.771  | 0.191 | 4.035  | 0.004   |
| <i>Echinacea purpurea</i> -<br><i>Lantana Camara</i>             | 0.497  | 0.280 | 1.776  | 0.862   |
| <i>Echinacea purpurea</i> -<br><i>Phlox paniculata</i>           | 2.412  | 0.406 | 5.945  | <0.0001 |
| <i>Echinacea purpurea</i> -<br><i>Phytolacca americana</i>       | 0.652  | 0.313 | 2.083  | 0.676   |
| <i>Echinacea purpurea</i> -<br><i>Plectranthus</i>               | 2.550  | 0.408 | 6.245  | <0.0001 |
| <i>Echinacea purpurea</i> -<br><i>Solidago nemoralis</i>         | 0.533  | 0.226 | 2.361  | 0.472   |
| <i>Echinacea purpurea</i> -<br>( <i>Vitex agnus-castus</i> )     | 1.082  | 0.302 | 3.587  | 0.020   |
| <i>Kalimeris integrifolia</i> -<br><i>Lantana Camara</i>         | -0.274 | 0.308 | -0.888 | 1.000   |
| <i>Kalimeris integrifolia</i> -<br><i>Phlox paniculata</i>       | 1.641  | 0.426 | 3.855  | 0.008   |
| <i>Kalimeris integrifolia</i> -<br><i>Phytolacca americana</i>   | -0.119 | 0.337 | -0.353 | 1.000   |
| <i>Kalimeris integrifolia</i> -<br><i>Plectranthus</i>           | 1.779  | 0.425 | 4.182  | 0.002   |
| <i>Kalimeris integrifolia</i> -<br><i>Solidago nemoralis</i>     | -0.238 | 0.250 | -0.951 | 0.999   |
| <i>Kalimeris integrifolia</i> -<br>( <i>Vitex agnus-castus</i> ) | 0.312  | 0.328 | 0.950  | 0.999   |
| <i>Lantana Camara</i> -<br><i>Phlox paniculata</i>               | 1.915  | 0.371 | 5.168  | <0.0001 |
| <i>Lantana Camara</i> -<br><i>Phytolacca americana</i>           | 0.155  | 0.286 | 0.540  | 1.000   |
| <i>Lantana Camara</i> -<br><i>Plectranthus</i>                   | 2.053  | 0.422 | 4.862  | <0.0001 |

|                                                         |        |       |        |        |
|---------------------------------------------------------|--------|-------|--------|--------|
| <i>Lantana Camara -<br/>Solidago nemoralis</i>          | 0.036  | 0.323 | 0.111  | 1.000  |
| <i>Lantana Camara -<br/>(Vitex agnus-castus )</i>       | 0.585  | 0.254 | 2.308  | 0.511  |
| <i>Phlox paniculata -<br/>Phytolacca americana</i>      | -1.760 | 0.410 | -4.297 | 0.001  |
| <i>Phlox paniculata -<br/>Plectranthus</i>              | 0.138  | 0.513 | 0.269  | 1.000  |
| <i>Phlox paniculata -<br/>Solidago nemoralis</i>        | -1.879 | 0.436 | -4.307 | 0.001  |
| <i>Phlox paniculata -<br/>(Vitex agnus-castus )</i>     | -1.330 | 0.387 | -3.437 | 0.034  |
| <i>Phytolacca americana -<br/>Plectranthus</i>          | 1.898  | 0.451 | 4.209  | 0.002  |
| <i>Phytolacca americana -<br/>Solidago nemoralis</i>    | -0.119 | 0.352 | -0.338 | 1.000  |
| <i>Phytolacca americana -<br/>(Vitex agnus-castus )</i> | 0.431  | 0.308 | 1.398  | 0.975  |
| <i>Plectranthus –<br/>Solidago nemoralis</i>            | -2.017 | 0.439 | -4.597 | 0.0003 |
| <i>Plectranthus –<br/>Vitex agnus-castus</i>            | -1.468 | 0.436 | -3.363 | 0.043  |
| <i>Solidago nemoralis -<br/>(Vitex agnus-castus )</i>   | 0.549  | 0.342 | 1.607  | 0.928  |



Table S10. Experiment 2, Survival: Comparison between models that included the location of the inoculum droplet on the flower with a model that did not include the location of the droplet.

| <b>Plant species</b>          | <b><i>X</i><sup>2</sup></b> | <b><i>DF</i></b> | <b><i>P</i></b> |
|-------------------------------|-----------------------------|------------------|-----------------|
| <i>Agastache foeniculum</i>   | 3.7386                      | 1                | 0.0532          |
| <i>Angelonia angustifolia</i> | 0.1039                      | 1                | 0.7472          |
| <i>Antirrhinum majus</i>      | 1.8969                      | 1                | 0.1684          |
| <i>Asclepia tuberosa</i>      | 0.00081                     | 1                | 0.9768          |
| <i>Coreopsis verticillata</i> | 0.1654                      | 1                | 0.684           |
| <i>Echinacea purpurea</i>     | 21.3                        | 1                | <0.0001         |
| <i>Kalimeris integrifolia</i> | 1.4302                      | 1                | 0.2317          |
| <i>Lantana Camara</i>         | 0.1021                      | 1                | 0.7493          |
| <i>Phlox paniculata</i>       | 3.5962                      | 1                | 0.0601          |
| <i>Vitex agnus-castus</i>     | 2.8487                      | 1                | 0.0914          |
